# Supplementary material for: Identification of independent association signals and putative functional variants for breast cancer risk through fine-scale mapping of the 12p11 locus
Source: Springer Nature journal article supplement (doi:10.1186/s13058-016-0718-0), 2016-06-21
Supplement: MOESM2 [file 13058_2016_718_MOESM2_ESM.pdf]

Table S3 Independent association signals for risk of estrogen (ER) -positive and ER-negative breast cancer in European descendants

| SNPs*                                  | Position (hg 19) | Alleles | EAF  | Univariate Analysis                 |                       | Conditional Analysis <sup>b</sup>   |                      |
|----------------------------------------|------------------|---------|------|-------------------------------------|-----------------------|-------------------------------------|----------------------|
|                                        |                  |         |      | Per-allele OR (95% CI) <sup>a</sup> | <i>P</i> trend        | Per-allele OR (95% CI) <sup>c</sup> | <i>P</i> trend       |
| ER-positive breast cancer <sup>e</sup> |                  |         |      |                                     |                       |                                     |                      |
| rs7297051                              | 28174817         | T*/C    | 0.23 | 0.89 (0.87-0.91)                    | 4 × 10 <sup>-18</sup> | 0.92 (0.89-0.95)                    | 7 × 10 <sup>-7</sup> |
| rs805510                               | 28139846         | T*/C    | 0.11 | 0.87 (0.84-0.90)                    | 3 × 10 <sup>-15</sup> | 0.93 (0.89-0.98)                    | 3 × 10 <sup>-3</sup> |
| rs1871152                              | 28379826         | G*/A    | 0.31 | 0.95 (0.93-0.97)                    | 9 × 10 <sup>-5</sup>  | 0.97 (0.94-0.99)                    | 0.01                 |
| ER-negative breast cancer <sup>f</sup> |                  |         |      |                                     |                       |                                     |                      |
| rs7297051                              | 28174817         | T*/C    | 0.22 | 0.87 (0.83-0.91)                    | 3 × 10 <sup>-10</sup> | 0.91 (0.86-0.96)                    | 8 × 10 <sup>-4</sup> |
| rs805510                               | 28139846         | T*/C    | 0.10 | 0.83 (0.79-0.88)                    | 8 × 10 <sup>-10</sup> | 0.90 (0.84-0.97)                    | 7 × 10 <sup>-3</sup> |
| rs1871152                              | 28379826         | G*/A    | 0.30 | 0.93 (0.90-0.97)                    | 2 × 10 <sup>-3</sup>  | 0.95 (0.91-1.00)                    | 0.03                 |

EAF, effect allele frequency in cases; LD, linkage disequilibrium; OR, odds ratio; CI, confidence interval.

\*Lead SNPs for the three independent signals identified in the analysis for overall breast cancer risk.

<sup>a</sup> Adjusted for studies, and the top principle components.

<sup>b</sup> Test for heterogeneity between ER-positive and negative groups in the conditional analysis was conducted. The *P*-values for rs7297051, rs805510, and rs1871152 were 0.72, 0.44, and 0.51, respectively.

<sup>c</sup> Included all three variants, and was adjusted for studies, and the top eight principle components.

<sup>d</sup> Using stepwise regression analysis, three independent signals were identified for ER-positive breast cancer: rs7297051, rs805510, and rs7959641 (lies in signal 3 and in moderate LD with rs1871152 with an *r*<sup>2</sup> of 0.28).

<sup>f</sup> Using stepwise regression analysis, three independent signals were identified for ER-negative breast cancer: rs7297051, rs805510, and rs79712894 (lies in signal 3 and in LD with rs1871152 with an *r*<sup>2</sup> of 0.86).
