# Supplementary material for: Identification of independent association signals and putative functional variants for breast cancer risk through fine-scale mapping of the 12p11 locus
Source: Springer Nature journal article supplement (doi:10.1186/s13058-016-0718-0), 2016-06-21
Supplement: MOESM3 [file 10521230]

Table S4. Associations of independent signals for breast cancer risk for BRCA1 mutation carriers

| Signals                                                            | SNPs       | Position (hg 19) | Alleles | EAF  | LD ( $r^2$ ) <sup>§</sup> | Univariate Analysis                 |                    | Conditional Analysis                |                |
|--------------------------------------------------------------------|------------|------------------|---------|------|---------------------------|-------------------------------------|--------------------|-------------------------------------|----------------|
|                                                                    |            |                  |         |      |                           | Per-allele HR (95% CI) <sup>a</sup> | <i>P</i> trend     | Per-allele HR (95% CI) <sup>b</sup> | <i>P</i> trend |
| Index <sup>‡</sup>                                                 | rs10771399 | 28155080         | G*/A    | 0.10 | -                         | 0.86 (0.80-0.91)                    | 3×10 <sup>-6</sup> | -                                   | -              |
| Top SNPs identified for women of European descents in BCAC studies |            |                  |         |      |                           |                                     |                    |                                     |                |
| Signal 1                                                           | rs7297051  | 28174817         | T*/C    | 0.23 | 0.37                      | 0.89 (0.85-0.93)                    | 3×10 <sup>-7</sup> | 0.94 (0.90-0.98)                    | 0.01           |
| Signal 2                                                           | rs805510   | 28139846         | T*/C    | 0.11 | 0.85                      | 0.85 (0.80-0.90)                    | 3×10 <sup>-7</sup> | 0.94 (0.88-1.01)                    | 0.07           |
| Signal 3                                                           | rs1871152  | 28379826         | G*/A    | 0.31 | 0.04                      | 0.92 (0.88-0.96)                    | 1×10 <sup>-4</sup> | 0.96 (0.93-1.00)                    | 0.03           |

EAF, effect allele frequency in all participants; LD, linkage disequilibrium; HR, hazard ratio; CI, confidence interval.

<sup>‡</sup> Identified in the initial GWAS conducted for women of European descent [1].

\* Effect alleles.

<sup>§</sup> Linkage disequilibrium with rs10771399 for BRCA1 mutation carriers.

<sup>a</sup> Adjusted for studies, and the top principal components.
