# Supplementary material for: Identification of independent association signals and putative functional variants for breast cancer risk through fine-scale mapping of the 12p11 locus
Source: Springer Nature journal article supplement (doi:10.1186/s13058-016-0718-0), 2016-06-21
Supplement: MOESM4 [file 13058_2016_718_MOESM4_ESM.pdf]

Table S5 Associations of independent signals for breast cancer risk in women of East Asian and African descent

| Signal                              | SNPs                     | Position<br>(hg 19) | Allele | EAF  | LD <sup>§</sup><br>(R <sup>2</sup> ) | Univariate Analysis                 |                      |
|-------------------------------------|--------------------------|---------------------|--------|------|--------------------------------------|-------------------------------------|----------------------|
|                                     |                          |                     |        |      |                                      | Per-allele OR (95% CI) <sup>b</sup> | P trend <sup>b</sup> |
| <b>Women of East Asian ancestry</b> |                          |                     |        |      |                                      |                                     |                      |
| Index <sup>‡</sup>                  | rs10771399               | 28155080            | G*/A   | 0.17 | -                                    | 0.87 (0.81-0.93)                    | 5×10 <sup>-5</sup>   |
| Signal 1                            | rs7297051                | 28174817            | T*/C   | 0.22 | 0.70                                 | 0.88 (1.07-1.21)                    | 2 ×10 <sup>-5</sup>  |
| Signal 2                            | rs805510                 | 28139846            | T*/C   | 0.15 | 0.86                                 | 0.88 (0.82-0.94)                    | 5×10 <sup>-4</sup>   |
| Signal 3                            | rs1871152                | 28379826            | G*/A   | 0.08 | 0.00                                 | 0.96 (0.86-1.07)                    | 0.48                 |
| Signal 4                            | rs113824616 <sup>a</sup> | 28184905            | C*/T   | 0.08 | 0.62                                 | 0.84 (0.70-0.99)                    | 0.04                 |
| <b>Women of African ancestry</b>    |                          |                     |        |      |                                      |                                     |                      |
| Index <sup>‡</sup>                  | rs10771399               | 28155080            | G*/A   | 0.04 | -                                    | 0.82 (0.58-1.14)                    | 0.23                 |
| Signal 1                            | rs7297051                | 28174817            | T*/C   | 0.13 | 0.14                                 | 0.95 (0.79-1.14)                    | 0.61                 |
| Signal 2                            | rs805510                 | 28139846            | T*/C   | 0.45 | 0.01                                 | 0.96 (0.85-1.08)                    | 0.51                 |
| Signal 3                            | rs1871152                | 28379826            | G*/A   | 0.37 | 0.00                                 | 0.95 (0.83-1.08)                    | 0.47                 |
| Signal 4                            | rs113824616 <sup>a</sup> | 28184905            | C*/T   | 0.01 | 0.56                                 | 0.86 (0.12-5.70)                    | 0.87                 |

EAF, effect allele frequency in controls; LD, linkage disequilibrium; OR, odds ratio; CI, confidence interval.

<sup>‡</sup> Identified in the initial GWAS conducted in women of European descent (1).

\*Effect alleles.

<sup>§</sup> Linkage disequilibrium with rs10771399 in women of Asian or African descent.

<sup>a</sup> The OR for rs113824616 were estimated using ER(-) cases and all controls.

<sup>b</sup> Adjusted for studies, and the top two principal components.
