# Supplementary material for: Identification of independent association signals and putative functional variants for breast cancer risk through fine-scale mapping of the 12p11 locus
Source: Springer Nature journal article supplement (doi:10.1186/s13058-016-0718-0), 2016-06-21
Supplement: MOESM5 [file 10521230]

Table S2 List of the variants that were retained for further functional annotation

| Signal 1        | Signal 2        | Signal 3         |                  |                  |                  |                  |                  | Signal 4    |
|-----------------|-----------------|------------------|------------------|------------------|------------------|------------------|------------------|-------------|
| rs812020        | Chr12:281404071 | rs11049361       | rs1824767        | chr12:28346793:D | rs10771406       | rs11049511       | rs11049606       | rs113824616 |
| Chr12:281640441 | rs788458        | rs11049416       | rs10843135       | rs11610011       | rs11049391       | rs11049527       | rs9669509        | rs150206154 |
| rs2590275       | rs1314085       | rs79712894       | rs1824766        | rs11519332       | rs11049491       | rs11049417       | rs11049620       |             |
| rs2619434       | Chr12:28144690D | rs11049386       | rs7973241        | rs11049469       | rs10771410       | rs10843154       | rs11049629       |             |
|                 | Chr12:28140399I | rs10843139       | rs11049460       | rs11049437       | rs10843114       | chr12:28451670:D | chr12:28544983:D |             |
|                 | rs1267210       | rs11524516       | rs7973656        | rs7303747        | rs11049496       | chr12:28489383:D | rs10506032       |             |
|                 | rs10843068      | rs61922969       | rs7973516        | rs10843141       | chr12:28297884:I | rs11049528       |                  |             |
|                 | rs1267212       | rs56318627       | rs11049442       | rs12320545       | rs10843103       | chr12:28441430:D |                  |             |
|                 | rs16932559      | rs11049476       | rs10843133       | rs11049370       | rs11049566       | rs10843172       |                  |             |
|                 | rs788462        | rs7974904        | rs1585682        | rs11049369       | rs11049424       | rs11049615       |                  |             |
|                 | rs251952        | rs7961407        | rs61920243       | rs10843134       | rs11049425       | chr12:28604973:I |                  |             |
|                 | rs10843069      | rs11049415       | rs11049444       | rs11049390       | rs11049570       | chr12:28480090:D |                  |             |
|                 | rs11612977      | rs10843126       | rs11049445       | rs11049388       | chr12:28297881:I | rs11049594       |                  |             |
|                 | rs1270113       | rs10843127       | rs34378873       | rs17801442       | rs11049371       | rs7313833        |                  |             |
|                 | rs12231591      | rs11049448       | rs11049440       | rs11049384       | rs10771408       | rs11049572       |                  |             |
|                 | rs1267205       | rs61920242       | rs11049441       | rs10843140       | rs11049493       | rs12368745       |                  |             |
|                 | rs10843067      | rs11049409       | rs60193273       | rs11049447       | rs11049582       | rs7137557        |                  |             |
|                 | rs788464        | chr12:28335056:I | rs11049439       | rs11049514       | rs2045887        | rs10843163       |                  |             |
|                 | rs11049293      | rs11049414       | rs7961769        | chr12:28384630:D | rs61920563       | rs59193275       |                  |             |
|                 | rs251955        | rs9766606        | rs7974701        | rs11049472       | rs10771411       | rs59879751       |                  |             |
|                 | rs11049272      | rs61920228       | rs11049420       | rs11049468       | rs11049584       | rs60960895       |                  |             |
|                 | rs1267206       | rs7138173        | rs10843123       | rs11049474       | rs74515560       | rs11049577       |                  |             |
|                 | rs2737448       | chr12:28337992:I | rs12146881       | rs11049467       | rs11049495       | rs11049537       |                  |             |
|                 | rs10843071      | chr12:28337721:D | rs11049446       | rs12370271       | rs7956671        | rs2348235        |                  |             |
|                 | rs251951        | rs7307078        | rs10843124       | rs11049465       | rs10843146       | rs11049619       |                  |             |
|                 | rs251950        | rs12372073       | rs10843130       | rs7980441        | chr12:28361249:I | rs10843167       |                  |             |
|                 | Chr12:28072287  | rs12372059       | rs11049405       | rs10843104       | rs11049517       | rs10843170       |                  |             |
|                 | rs2737447       | chr12:28345826:I | rs11049457       | rs1824768        | chr12:28624623:D | rs10843169       |                  |             |
|                 | rs805515        | rs7974979        | rs61920245       | rs11049454       | rs117066882      | rs11049575       |                  |             |
|                 | rs11049292      | rs10843137       | rs11049455       | rs11049376       | rs12371059       | rs12372448       |                  |             |
|                 | rs1267208       | rs1478335        | rs73261702       | rs12367188       | chr12:28432808:D | rs11049581       |                  |             |
|                 | rs10843066      | rs1478334        | rs61920253       | chr12:28343675:D | rs7964793        | rs11049426       |                  |             |
|                 | rs788457        | rs1478336        | chr12:28355420:I | rs11049410       | rs2172299        | rs11049427       |                  |             |
|                 | rs142450317     | rs11049429       | rs11049453       | rs10219470       | rs11049503       | rs11049579       |                  |             |
|                 | rs1267213       | rs4284426        | rs11049480       | rs7955118        | rs61922974       | rs11049612       |                  |             |
|                 | rs788455        | chr12:28347065:D | rs10843125       | rs7955237        | chr12:28312811:I | rs11049618       |                  |             |
|                 | rs11049290      | rs11049413       | rs7957382        | rs11049363       | rs61922976       | rs11049613       |                  |             |
|                 | rs788463        | rs12366932       | rs7957503        | rs17801436       | rs61922975       | chr12:28596922:D |                  |             |

|                 |                  |                  |                  |                  |                  |
|-----------------|------------------|------------------|------------------|------------------|------------------|
| rs809291        | rs11049428       | rs4554927        | rs11049360       | rs7294486        | rs12368409       |
| rs2619433       | rs2061758        | rs7957059        | rs7305286        | rs11049666       | rs10843162       |
| rs788459        | rs10843138       | rs4573721        | rs11049470       | rs11049430       | rs11049545       |
| rs10843061      | rs11049412       | rs1551986        | rs12371462       | rs61922977       | rs10843155       |
| rs2619411       | rs11049475       | rs1551987        | chr12:28316338:D | rs11049667       | rs11049538       |
| rs805513        | rs6487671        | rs11049402       | rs7958401        | chr12:28453440:I | rs11049583       |
| rs10843057      | rs11049419       | rs10492368       | rs11049403       | rs11049505       | rs10843164       |
| rs10843058      | rs7298652        | rs10843129       | rs10492369       | rs11049507       | rs11049547       |
| rs11049285      | rs11049423       | chr12:28326163:D | rs11049393       | rs11049509       | chr12:28333106:D |
| rs11049276      | rs11049422       | rs10843128       | rs11049385       | rs11049510       | chr12:28489862:I |
| rs1975930       | rs6487669        | rs1841962        | rs7959641        | rs9645730        | rs11049540       |
| rs2737455       | chr12:28363949:D | rs7957056        | chr12:28369597:D | rs61922978       | rs11049604       |
| rs10771399      | rs11049471       | rs11612143       | chr12:28369596:D | rs11049532       | rs61920565       |
| rs11049280      | chr12:28349282:I | chr12:28362760:I | chr12:28276960:D | rs17432330       | rs11049543       |
| rs11049281      | rs10843131       | rs11049389       | rs11049533       | rs11049515       | rs11049541       |
| rs11049289      | rs11513466       | chr12:28329536:D | rs11049576       | rs11049516       | rs11049544       |
| rs11049282      | rs11049421       | rs7969582        | rs11049387       | rs11049531       | rs11049609       |
| rs11049278      | rs11519331       | rs7955094        | chr12:28276967:I | rs10506029       | rs11049608       |
| rs11049279      | rs61920244       | chr12:28349087:I | rs10843110       | rs11049530       | rs11049563       |
| rs11049283      | rs11513467       | rs7961395        | rs61920241       | rs10843150       | rs10843159       |
| rs7976725       | rs11049464       | chr12:28348381:I | rs4357727        | rs61922979       | rs11049600       |
| rs10843053      | rs7306838        | rs7974882        | rs2061760        | rs11049521       | rs10843157       |
| rs11049277      | rs11494779       | rs12368652       | rs12369144       | rs11049518       | rs11049558       |
| rs10843054      | rs11049438       | rs11049395       | rs11049359       | rs10843153       | rs11049550       |
| rs12230582      | chr12:28392506:D | rs11049392       | rs11049484       | rs10843152       | rs11049556       |
| Chr12:28166131I | rs11519330       | rs11049394       | rs11519095       | rs10843151       | rs61920564       |
| Chr12:28060602  | rs11513250       | rs11049399       | rs1479492        | rs11049520       | rs11049555       |
| rs809816        | rs11513465       | rs61920227       | rs11049485       | rs3782517        | rs12371222       |
| rs10843064      | rs11519094       | rs11049397       | rs10843143       | rs3825246        | rs11049567       |
| rs10843063      | rs7956418        | rs11049400       | rs11049488       | rs3782515        | rs11049554       |
| rs11049295      | rs7971033        | rs11049401       | rs10771409       | rs11049524       | rs10843158       |
| rs11049286      | rs11049443       | rs10843132       | rs57618147       | rs11049525       | rs11049617       |
| rs1838564       | rs9645745        | rs12372372       | rs10843111       | rs12371974       | rs11049552       |
| rs2619415       | rs11049407       | rs11049478       | rs10843112       | rs11049526       | rs11049553       |
| rs10843062      | rs11049459       | chr12:28300276:I | rs716687         | rs184460060      | rs61915974       |
| rs10843059      | rs11049458       | rs11049398       | rs7980151        | rs60703205       | rs11049549       |
