# Supplementary material for: Identification of independent association signals and putative functional variants for breast cancer risk through fine-scale mapping of the 12p11 locus
Source: Springer Nature journal article supplement (doi:10.1186/s13058-016-0718-0), 2016-06-21
Supplement: MOESM6 [file 13058_2016_718_MOESM6_ESM.pdf]

Table S6 Putative functional SNPs identified using the ENCODE data

| Signal | SNP        | Position | Alleles | Imputation R <sup>2</sup> | European descendants |         | East Asian descendants |         | African descendants |         | RegulomeD B score <sup>a</sup> |
|--------|------------|----------|---------|---------------------------|----------------------|---------|------------------------|---------|---------------------|---------|--------------------------------|
|        |            |          |         |                           | OR 95% CI            | P-value | OR 95% CI              | P-value | OR 95% CI           | P-value |                                |
| 1      | rs812020   | 28151609 | C*/A    | Genotyped                 | 0.89 (0.87-0.91)     | 2E-27   | 0.88 (0.83-0.94)       | 5E-05   | 0.93 (0.82-1.06)    | 0.27    | 3a                             |
| 2      | rs788463   | 28152648 | A*/T    | Genotyped                 | 1.17 (1.14-1.21)     | 5E-25   | 1.16 (1.08-1.24)       | 3E-05   | 0.93 (0.61-1.41)    | 0.72    | 2b                             |
| 2      | rs10843066 | 28176797 | T*/C    | Genotyped                 | 1.17 (1.14-1.21)     | 3E-25   | 1.14 (1.07-1.22)       | 8E-05   | 1.00 (0.76-1.31)    | 0.97    | 2b                             |
| 3      | rs10843110 | 28289141 | T*/G    | 0.999                     | 1.06 (1.04-1.08)     | 2E-07   | 0.95 (0.87-1.03)       | 0.21    | 1.09 (0.95-1.24)    | 0.22    | 2b                             |
| 3      | rs56318627 | 28345652 | C*/T    | 0.9995                    | 1.06 (1.04-1.08)     | 6E-08   | 1.06 (0.94-1.19)       | 0.35    | 1.04 (0.91-1.19)    | 0.57    | 2b                             |
| 3      | rs11049453 | 28355929 | G*/A    | Genotyped                 | 1.06 (1.04-1.08)     | 9E-08   | 1.06 (0.94-1.19)       | 0.32    | 1.03 (0.88-1.19)    | 0.71    | 2b                             |

Effect allele.

<sup>a</sup> A Regulome DB score of 2b suggests that the SNP is predicted to be likely to affect gene expression level, and the evidence includes transcription factor binding, any motif change, DNase Footprint, and DNase peak; a score of 3a suggest that the evidence for the SNP is from transcription factor binding, any motif change, and DNase peak.
