# Supplementary material for: Identification of independent association signals and putative functional variants for breast cancer risk through fine-scale mapping of the 12p11 locus
Source: Springer Nature journal article supplement (doi:10.1186/s13058-016-0718-0), 2016-06-21
Supplement: MOESM7 [file 13058_2016_718_MOESM7_ESM.pdf]

Table S7 Gene expression analysis for putative functional SNPs using 1,006 breast tumor samples in TCGA

| SNP ID          | Gene          | Effect Allele | Ref Allele | Beta <sup>a</sup> | P-value |
|-----------------|---------------|---------------|------------|-------------------|---------|
| <b>Signal 1</b> |               |               |            |                   |         |
| rs812020        | <i>PTHLH</i>  | A             | C          | 0.03              | 0.65    |
| rs812020        | <i>CCDC91</i> | A             | C          | 0.06              | 0.27    |
| <b>Signal 2</b> |               |               |            |                   |         |
| rs788463        | <i>PTHLH</i>  | A             | T          | 0.04              | 0.69    |
| rs10843066      | <i>PTHLH</i>  | T             | C          | 0.07              | 0.41    |
| rs788463        | <i>CCDC91</i> | A             | T          | 0.01              | 0.88    |
| rs10843066      | <i>CCDC91</i> | T             | C          | 0.03              | 0.70    |
| <b>Signal 3</b> |               |               |            |                   |         |
| rs10843110      | <i>PTHLH</i>  | T             | G          | 0.13              | 0.02    |
| rs56318627      | <i>PTHLH</i>  | C             | T          | 0.15              | 0.01    |
| rs11049453      | <i>PTHLH</i>  | G             | A          | 0.15              | 0.01    |
| rs10843110      | <i>CCDC91</i> | T             | G          | -0.11             | 0.08    |
| rs56318627      | <i>CCDC91</i> | C             | T          | -0.11             | 0.07    |
| rs11049453      | <i>CCDC91</i> | G             | A          | -0.13             | 0.03    |

<sup>a</sup> The regression coefficient for each SNP estimated in the residual linear regression.
